# Supplementary material
Source: publisher site journal article supplement (https://www.dovepress.com/article/547235)
Supplement: Supplementary file 1 [file 547235%20Supplementary%20Material.docx]

Table S1. Summary of assessment instruments and their scoring criteria.

| **Construct Measured** | **Instrument Name** | **Items** | **Scoring Range** | **Cut-off Value** | **Reference** |
| --- | --- | --- | --- | --- | --- |
| Physical Frailty (PF) | FRAIL Scale | 5 items: unintended weight loss,  resistance,  fatigue,  illnesses,  and ambulation. | Adding up the scores of five items, scoring range is 0-5 | 0 : Robust,  1-2 : Pre-frail, 3-5 : Frail | [21] |
| Cognitive Function | Chinese Mini-Mental Status (CMMS) Examination | 7 items :  time orientation,  place orientation,  immediate memory,  attention and calculation,  delayed memory,  language,  visual space | 30 questions in total for 7 items, 1 point for each correct question and 0 point for each error. Adding all the scores, the scoring range is 0-30 | MCI Diagnosis:  ≤17 for illiterate individuals  ≤20 for those with primary school education  <24 for those with secondary education or higher  Exclusion Criteria:  CMMS total score < 10 | [24] |
| Dysphagia | Eating Assessment Tool (EAT-10) | 10 items :  Weight loss:;  Social impact;  Liquid dysphagia;  Solid dysphagia;  Pill dysphagia;  Painful swallowing;  Pleasure reduction;  Food sticking;  Coughing when eating;  Swallowing stress. | Each item is scored between 0 (no problem) to 4 (severe problem). Summing all scores together, the scoring range is 0-40. | 0-2 : no obvious dysphagia, ≥ 3 : dysphagia | [27] |
| Basic Activities of Daily Living (ADLs) | Barthel Index (BI) | 10 items :  eating,  bed and chair transfering, personal hygiene, toileting,  bathing,  walking on the flat,  going up and down stairs,  dressing,  stool control,  urination control | Each item is scored between 0 (severe functional defects) to 10 (completely self-care). Summing all scores together, the scoring range is 0-100. | 100 : Normal < 100 : Impaired  ≥ 3 ADLs need assistance : Severe Dependence | [31] [33] |
| Instrumental ADLs (IADLs) | Lawton Scale | 8 items making phone calls,  shopping,  preparing food, housework,  washing clothes,  taking transportation,  taking medicine,  financial processing | Three-level rating system(most common) :  each item is scored between 1 (severe functional defects) to 3 (completely self-care). Summing all scores together, the scoring range is 8-24. | ≥ 1 IADLs need assistance : Disability | [32] |
| Depressive Symptoms | Geriatric Depression Scale-15 (GDS-15) | 15 items can be summarized into five dimensions, including:  positive feelings lackage,  negative emotions,  social withdrawal,  negative self cognition, anxiety and cognitive problems | Adding up the scores of 15 yes or no questions (some are scored positively, some are scored negatively), the scoring range is 0-15. | 0-4 : Normal, ≥5 : Depression (5-9, mild depression ; 9-15, moderate to severe depression) | [35] [36] |
| Hearing Function | Self-reported Hearing | 1 item : self-reported | Categorical:  Good, Fair, Poor, Deaf | hearing impairment: if they used a hearing aid or selected any response other than “Good”. | [28][29] [30] |
